# Supplementary material for: Clinical Outcome of Colorectal Cancer Patients with Concomitant Hypertension: A Systematic Review and Meta-Analysis
Source: MDPI journal article supplement (doi:10.3390/jpm14050520), 2024-05-14
Supplement: s1 [file s1]

## Supplementary file

**Table S1. Search string**

| Database         | Search string                                                                                                                                                                                                                                                                                                                                                                                                                                                   |
|------------------|-----------------------------------------------------------------------------------------------------------------------------------------------------------------------------------------------------------------------------------------------------------------------------------------------------------------------------------------------------------------------------------------------------------------------------------------------------------------|
| Pubmed (Medline) | ((((((("HTN"[Mesh]) OR "Blood Pressure"[Mesh]) OR "Diastole"[Mesh]) OR "Systole"[Mesh]) AND "Colorectal Neoplasms"[Mesh]) OR "Rectal Neoplasms"[Mesh]) AND "Survival"[Mesh]) OR "Mortality"[Mesh]) OR "Disease-Free Survival"[Mesh]).                                                                                                                                                                                                                           |
| Embase           | 1-hypertension<br>2- Blood Pressure<br>3- Diastole<br>4- Systole<br>5- 1 OR 2 OR 3 OR 4<br>6- Colorectal Neoplasms<br>7- Rectal Neoplasms<br>8- 6 OR 7<br>9- Survival<br>10- Mortality<br>11- Disease-Free Survival<br>12- 9 OR 10 OR 11<br>13- 5 AND 8 AND 12                                                                                                                                                                                                  |
| Web of science   | 1 hypertension<br>2 Blood Pressure<br>3 Diastole<br>4 Systole<br>5 OR/1-4<br>6 Colorectal Neoplasms<br>7 Rectal Neoplasms<br>8 OR/6,7<br>9 Survival<br>10 Mortality<br>11 Disease-Free Survival<br>12 OR/9-11<br>13 5, 8, and 12                                                                                                                                                                                                                                |
| Scopus           | ((hypertension OR Blood Pressure OR Diastole OR Systole) AND (Colorectal Neoplasms OR Rectal Neoplasms) AND (Survival OR Mortality OR Disease-Free Survival))                                                                                                                                                                                                                                                                                                   |
| Cochrane Library | 1 Mesh descriptor: (hypertension) explore all trees<br>2 (hypertension*) or (blood pressure*) or (diastole*) or (systole*):ti, ab, kw<br>3 Or 1-2<br>4 Mesh descriptor: (Colorectal Neoplasms) explore all trees<br>5 (Colorectal Neoplasms *) or (Rectal Neoplasms *) : ti, ab, kw<br>6 Or 4-5<br>7 Mesh descriptor: (survival) explore all trees<br>8 (survival *) or (mortality *) or (Disease-Free Survival *): ti, ab, kw<br>9 Or 7-8<br>10 3 and 6, and 9 |

|        |                                                                                                                                                                                                  |
|--------|--------------------------------------------------------------------------------------------------------------------------------------------------------------------------------------------------|
|        |                                                                                                                                                                                                  |
| CINAHL | 1 hypertens* OR Blood Pressure [mh] OR diastol* OR systol*<br>2 Colorectal Neoplasms [mh] OR Rectal Neoplasms [mh]<br>3 Survival* OR Mortality* OR Disease-Free Survival [mh]<br>4 1 AND 2 AND 3 |
